# Supplementary material for: Existence of Similar Leptospira Serovars among Dog Keepers and Their Respective Dogs in Mwanza, Tanzania, the Need for a One Health Approach to Control Measures
Source: MDPI journal article supplement (doi:10.3390/pathogens10050609), 2021-05-16
Supplement: s1 [file s1]

### Supplementary File 1: Data collection tool

| PARTICIPANT'S PARTICULARS |                                                           |                                                                                                                                     |
|---------------------------|-----------------------------------------------------------|-------------------------------------------------------------------------------------------------------------------------------------|
| NO                        | Question                                                  | Response                                                                                                                            |
| 1.                        | Date                                                      | ____/____/20____                                                                                                                    |
| 2.                        | Study number                                              | _____                                                                                                                               |
| 3.                        | Mobile phone number                                       | LB-_____                                                                                                                            |
| 4.                        | Age (owner/attendant)                                     | _____                                                                                                                               |
| 5.                        | Sex (owner/attendant)                                     | 1. Male<br>2. Female                                                                                                                |
| 6.                        | Residence (mention place) _____                           | 1. Urban<br>2. Rural<br>3. Periurban                                                                                                |
| 7.                        | Marital status                                            | 1. Married<br>2. Single<br>3. Widowed<br>4. Divorced                                                                                |
| 8.                        | Education level                                           | 1. No formal education<br>2. Primary<br>3. Secondary<br>4. Tertiary                                                                 |
| 9.                        | Occupation                                                | 1. Meat seller/vendor<br>2. Abattoir worker<br>3. Dog keeper/ attendant<br>4. Veterinary worker<br>5. Meat inspector<br>6. Employed |
| ASSOCIATED FACTORS        |                                                           |                                                                                                                                     |
| 10.                       | For how long have you been keeping the dog(s)?            | Years _____ or months _____                                                                                                         |
| 11.                       | Did your dog(s) receive vaccine against leptospirosis?    | 1. YES<br>2. NO                                                                                                                     |
| 12.                       | Do you keep other animals different from dogs?            | 1. YES<br>2. NO                                                                                                                     |
| 13.                       | If YES mention them                                       | _____<br>_____<br>_____<br>_____                                                                                                    |
| 14.                       | Do you normally wash fruit/vegetables before consumption? | 1. YES<br>2. NO                                                                                                                     |
| 15.                       | Do you have a habit of eating during work/breaks?         | 1. YES                                                                                                                              |

|     |                                                                           |                                                                                                           |
|-----|---------------------------------------------------------------------------|-----------------------------------------------------------------------------------------------------------|
|     |                                                                           | 2. NO                                                                                                     |
| 16. | Do you wash your hands before and after eating?                           | 1. YES<br>2. NO                                                                                           |
| 17. | Do you always wear protective gears when attending the dog(s)?            | 1. YES<br>2. NO                                                                                           |
| 18. | If YES which one (s)?                                                     | 1. Coat<br>2. Gloves<br>3. Apron<br>4. Plastic boots<br>5. Cap<br>6. Face mask<br>7. Other (specify)..... |
| 19. | How often do you clean your protective gears?                             | 1. Everyday<br>2. Once a week<br>3. Twice a week<br>4. >2 a week                                          |
| 20. | Do you live in a house with sewage system (public service/septic tank)?   | 1. YES<br>2. NO                                                                                           |
| 21. | Are you engaged in paddy cultivation activities?                          | 1. YES<br>2. NO                                                                                           |
| 22. | Are there any abandoned plots near your house?                            | 1. YES<br>2. NO                                                                                           |
| 23. | Do you have direct contact with blood/organs from the slaughterhouse?     | 1. YES<br>2. NO                                                                                           |
| 24. | Do you have any contact with dog urine?                                   | 1. YES<br>2. NO                                                                                           |
| 25. | Have you been excluded from attending dog(s) when getting wounds/bruises? | 1. YES<br>2. NO                                                                                           |
| 26. | Have you been working in farms previously?                                | 1. YES<br>2. NO                                                                                           |
| 27. | Have you ever helped animal births?                                       | 1. YES<br>2. NO                                                                                           |
| 28. | If YES, did you wear any protective gears?                                | 1. YES<br>2. NO                                                                                           |
| 29. | Do you keep clothes clean after attending your dog(s)?                    | 1. YES<br>2. NO                                                                                           |
| 30. | Do you wash hands after animal contact?                                   | 1. YES<br>2. NO                                                                                           |
| 31. | Are you working with bare feet?                                           | 1. YES<br>2. NO                                                                                           |
| 32. | Have you ever been splashed with infected fluids (blood, urine, etc)?     | 1. YES<br>2. NO                                                                                           |

|     |                                                 |                 |
|-----|-------------------------------------------------|-----------------|
| 33. | Are there any rodents at home?                  | 1. YES<br>2. NO |
| 34. | Is there any fallow land near home(within 100m) | 1.YES<br>2:NO   |
